# Supplementary material for: Reversible Redox Effect on Gas Permeation of Cobalt Doped Ethoxy Polysiloxane (ES40) Membranes
Source: PubMed Central journal article supplement — Sci Rep. 2013 Apr 10;3:1648. doi: 10.1038/srep01648 (PMC3622081; doi:10.1038/srep01648), 2013-04-10
Supplement: srep01648-s1.pdf [file srep01648-s1.pdf]

# Scientific Reports

## Electronic Supplementary Information

### Reversible Redox Effect on Gas Permeation of Cobalt Doped Ethoxy Polysiloxane (ES40) Membranes

Christopher R. Miller, David K. Wang, Simon Smart, João C. Diniz da Costa\*

The University of Queensland, FIMLab – Films and Inorganic Membrane Laboratory, School of Chemical Engineering, Brisbane, QLD 4072, Australia

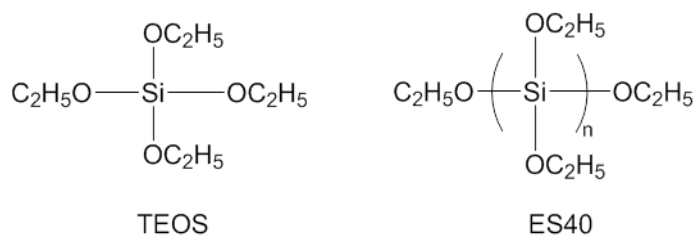

**S1.** Chemical structures of the tetraethylorthosilicate (TEOS) and the ethoxy polysiloxane (ES40).

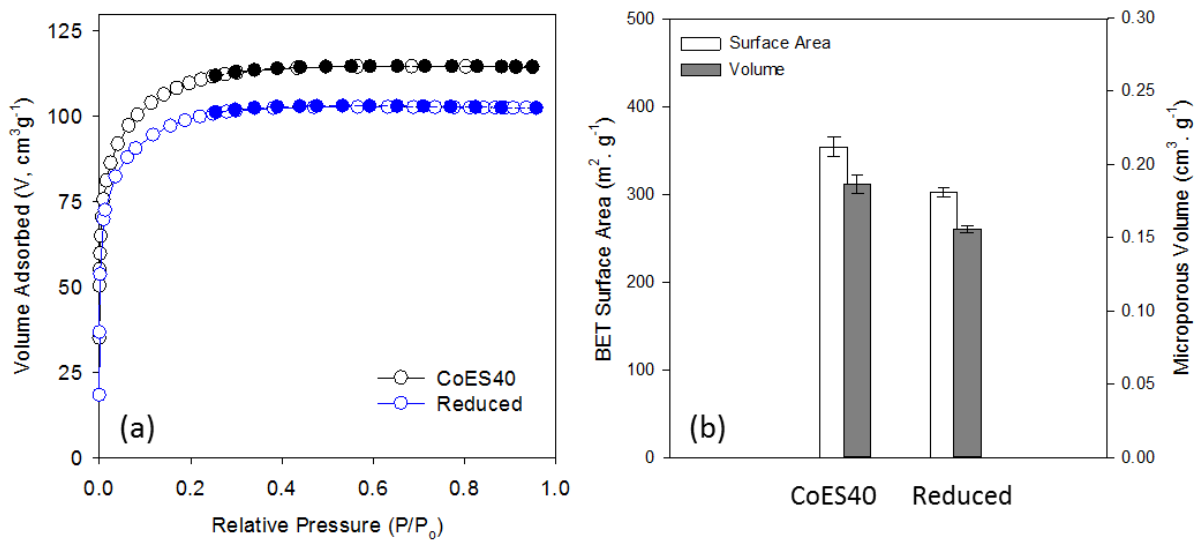

**S2.** (a)  $N_2$  adsorption (open circles) and desorption (closed circles) isotherms for the as prepared and hydrogen reduced CoES40 xerogels, and (b) their corresponding BET surface areas and microporous volumes.

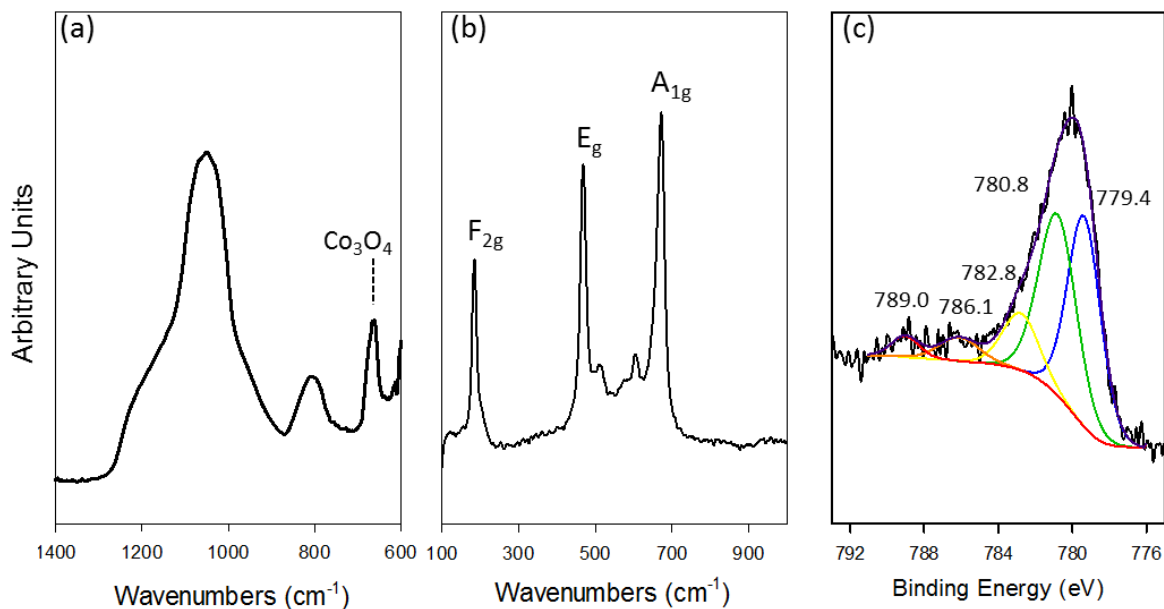

**S3.** Chemical compositions of the re-oxidised CoES40 xerogel (after He pre-conditioning) by (a) ATR-FTIR, (b) micro-Raman and (c) High resolution XPS of Co 2p.
